# Supplementary material for: Ammonium CI-Orbitrap: a tool for characterizing the reactivity of oxygenated organic molecules
Source: Copernicus journal article supplement (doi:10.5194/amt-2023-149), 2023-08-15
Supplement: Supplementary file 1 [file amt-2023-149-supplement.pdf]

---

*Supplementary of*

Ammonium CI-Orbitrap: a tool for characterizing the reactivity of oxygenated organic molecules

Dandan Li et al.

*Correspondence to:* Matthieu Riva ([matthieu.riva@ircelyon.univ-lyon1.fr](mailto:matthieu.riva@ircelyon.univ-lyon1.fr))

---

**Table S1** Main experimental conditions of selected runs analyzed by NH<sub>4</sub><sup>+</sup>-Orbitrap.

---

| Run  | $\alpha$ -pinene<br>(ppbv) | O <sub>3</sub><br>(ppbv) | NO <sub>x</sub><br>(ppbv) | CO<br>(ppbv) | SO <sub>2</sub><br>(ppbv) | RH<br>(%) | T<br>(°C) |
|------|----------------------------|--------------------------|---------------------------|--------------|---------------------------|-----------|-----------|
| 2211 | 2                          | 110                      | 0                         | 130          | 0                         | 10→80     | -10       |
| 2213 | 0.41                       | 110                      | 1.75                      | 1000         | 0                         | 20        | -10       |

---

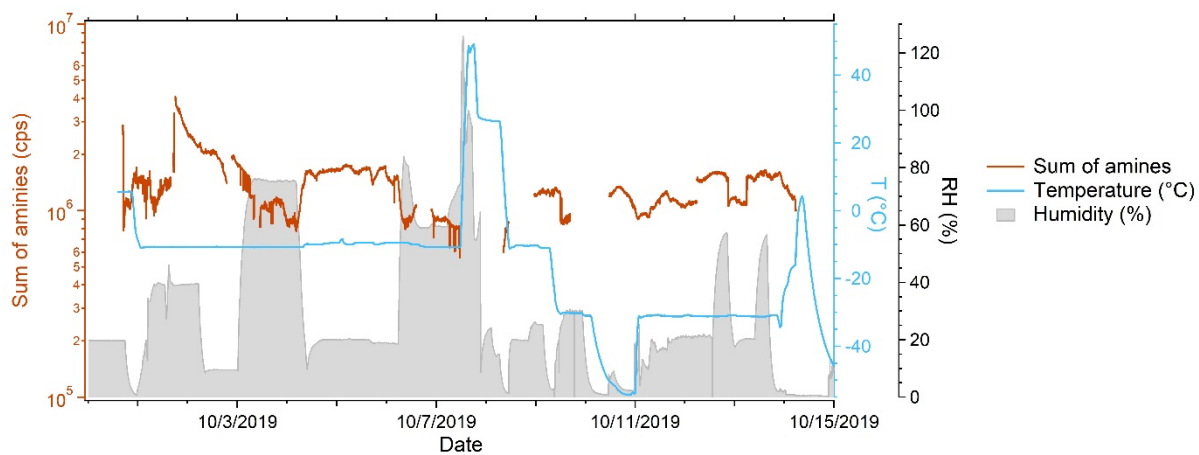

**Figure S1** Time evolution of sum of the 13 amines used to normalize signal intensity. Temperature and humidity are also reported throughout the different experiments when the  $\text{NH}_4^+$ -Orbitrap was used.

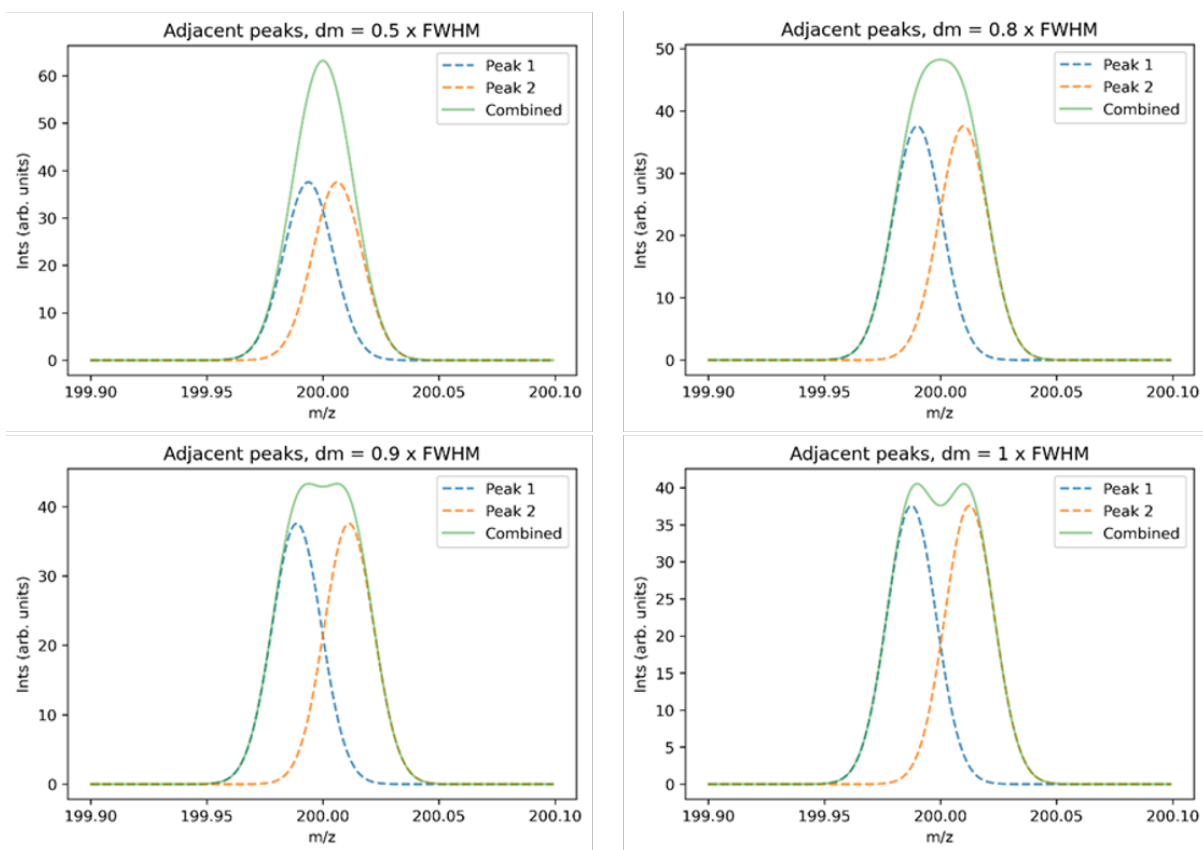

**Figure S2** Simulated TOF spectra of overlapping peaks of equal intensity near  $m/Q$  200 assuming a mass resolving power of 8,000, somewhere between that of a ToFwerk HTOF (“high-resolution time-of-flight”) and LTOF (“long high-resolution time-of-flight”) mass spectrometers. Noise wasn’t added to the data.

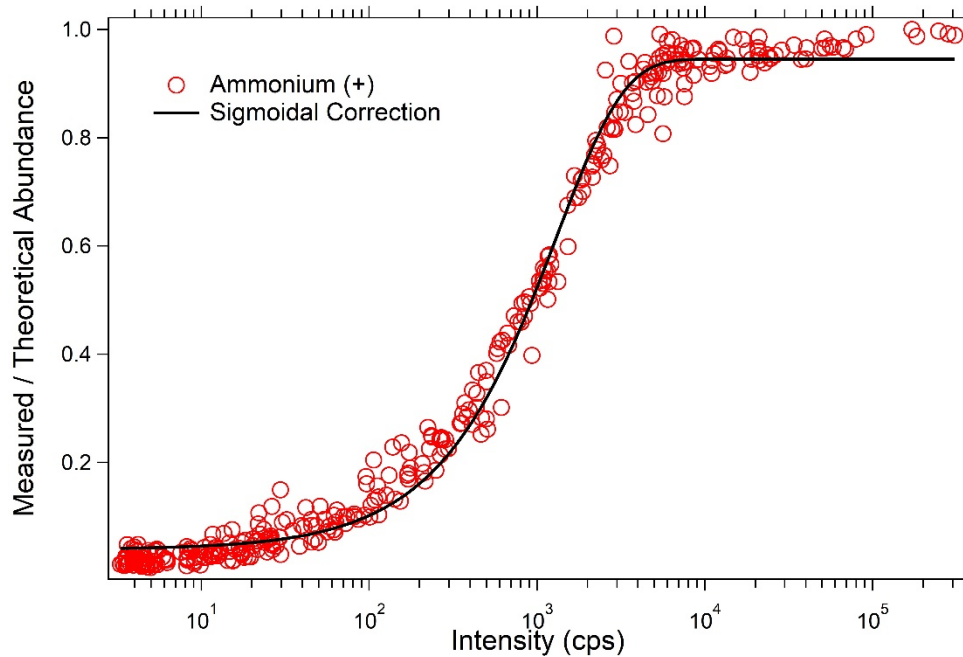

**Figure S3** Linearity of the Orbitrap as a function of signal intensity measured with ammonium ( $\text{NH}_4^+$ ) reagent ions. The black fit is the “sigmoidal correction function” based on a sigmoidal fitting algorithm.

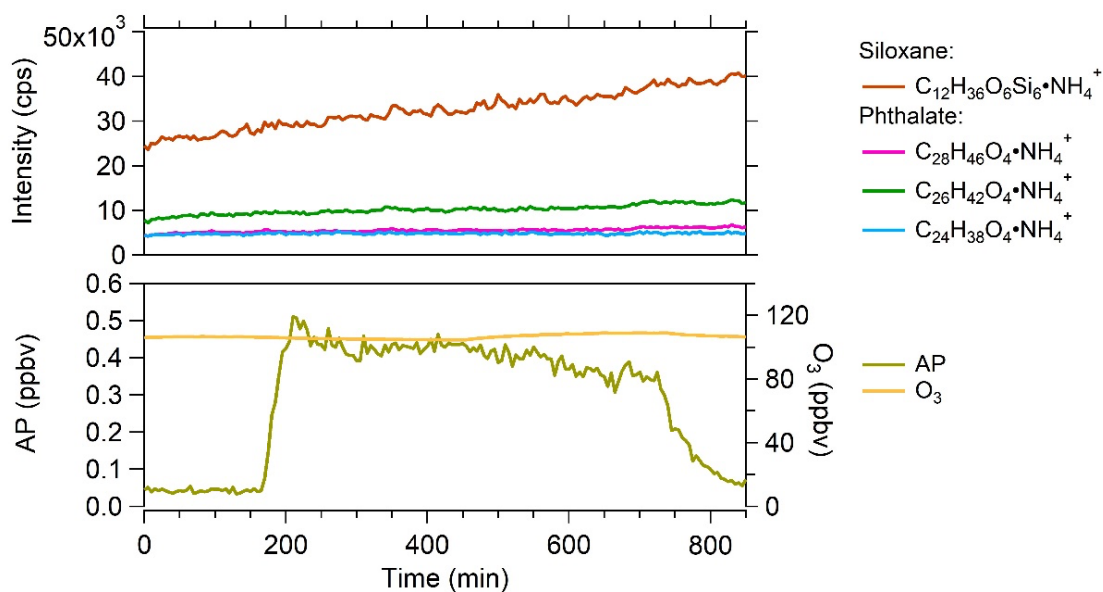

**Figure S4** Constant time evolution of background ions showing the linearity of reagent ion  $NH_4^+$ . Siloxanes and phthalates clustered with  $NH_4^+$  were not impacted by the addition of  $\alpha$ -pinene, which means that the ionization technique remains linear under atmospheric relevant conditions. Run 2213:  $\alpha$ -pinene oxidation products at  $-10^\circ C$  and 20% RH.  $\alpha$ -pinene was  $\sim 0.41$  ppbv and  $O_3 \sim 110$  ppbv,  $NO_2 \sim 1.75$  ppbv,  $NO \sim 0.12$  ppbv and  $CO \sim 1000$  ppbv.

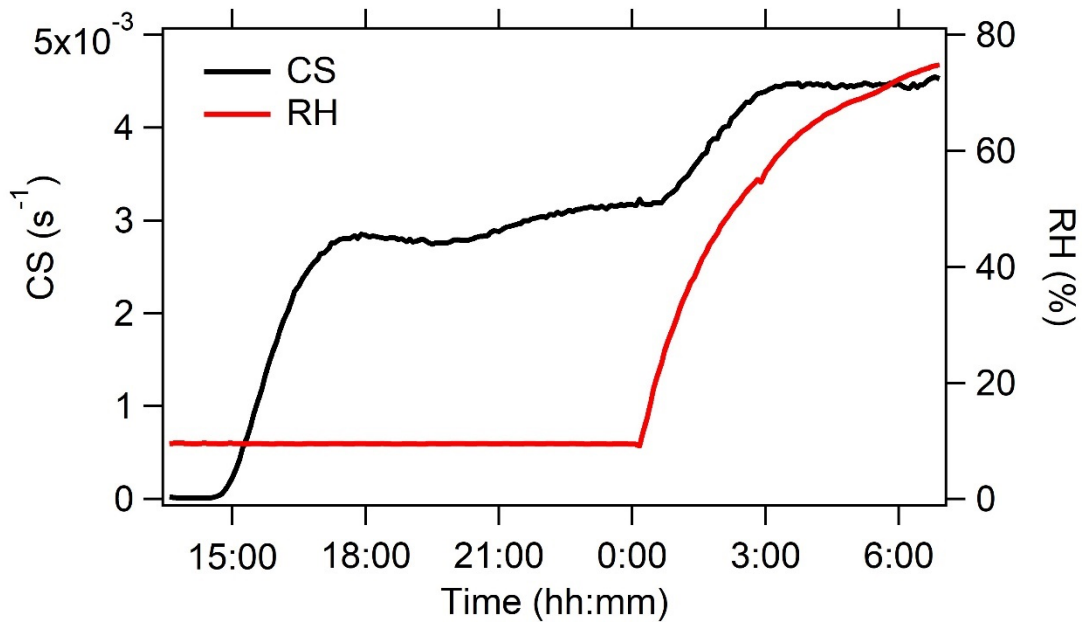

**Figure S5** Time series of condensation sink (CS) where the RH is ramped up in run 2211.

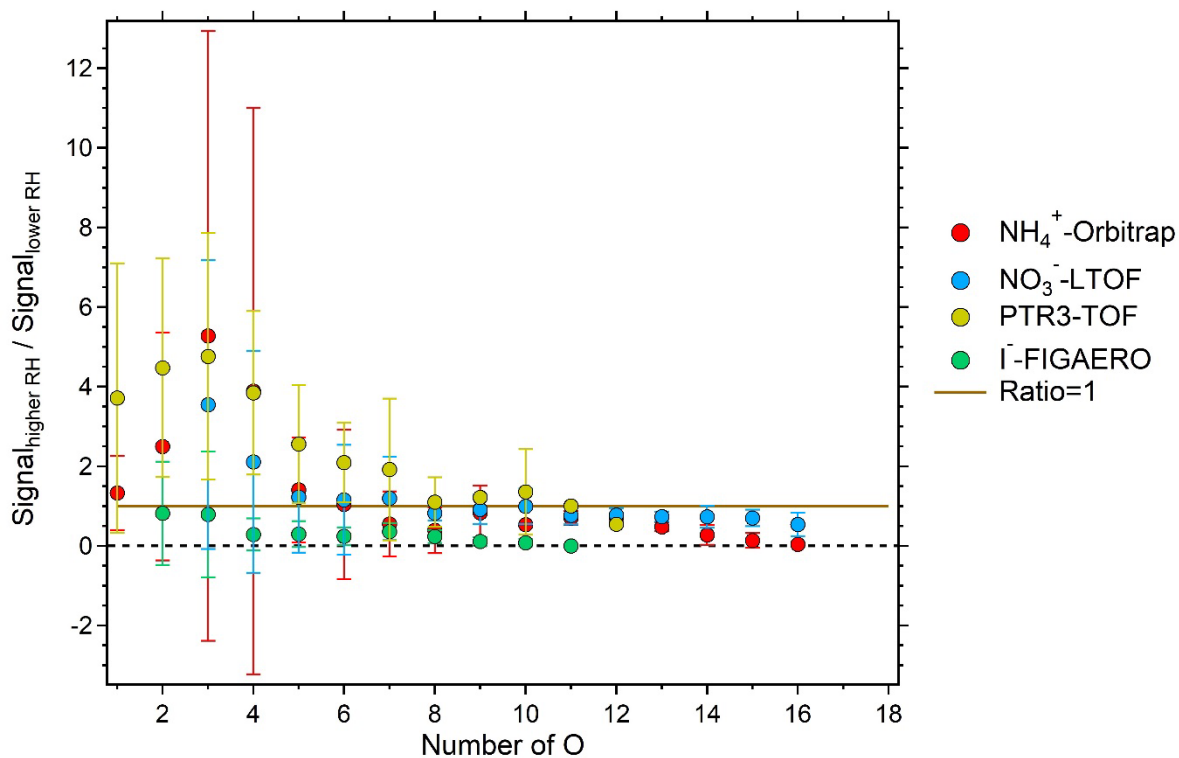

**Figure S6:** The relative humidity dependence of  $\alpha$ -pinene oxidation products measured by four MS instruments as a function of number of oxygen atoms. All measured C<sub>8-10</sub> monomers and C<sub>18-20</sub> dimers are used to study an RH effect. The RH ramped from ~10% to ~80% in run 2211.
